# Supplementary material for: Single Nucleotide Polymorphism rs6942067 Is a Risk Factor in Young and in Non-Smoking Patients with HPV Negative Head and Neck Squamous Cell Carcinoma
Source: Cancers (Basel). 2019 Dec 24;12(1):55. doi: 10.3390/cancers12010055 (PMC7017251; doi:10.3390/cancers12010055)
Supplement: Supplementary file 1 [file cancers-12-00055-s001.zip]

Archive with 4 entries (4 files):
- Figure S1.pdf
- Figure S2.pdf
- Table S1.xlsx
- Table S2.xlsx
