# Supplementary material for: Single Nucleotide Polymorphism rs6942067 Is a Risk Factor in Young and in Non-Smoking Patients with HPV Negative Head and Neck Squamous Cell Carcinoma
Source: Cancers (Basel). 2019 Dec 24;12(1):55. doi: 10.3390/cancers12010055 (PMC7017251; doi:10.3390/cancers12010055)
Supplement: Supplementary file 1 [file cancers-12-00055-s001.zip › Table S1.xlsx]

## Sheet: Feuil1
Supplementary Table 1. Raw data from the TCGA cohort.
ID	Age	HPV	Smoking History	DCBLD1 (log2 RSEM)	DCBLD1 mutation	3y Overall Survival (months)	0 = censor; 1 = deceased	Tumor size	Nodal Status	Gender	Localisation	Alcohol history	rs6942067
tcga-4p-aa8j	66	negative		10.889	no	3.35	0	large	positive	male	oral tongue
tcga-ba-4074	69	negative	yes	11.2986	no	15.18	1	large	positive	male	oral tongue		AA
tcga-ba-4075	49	negative	yes	10.6824	no	9.3	1	large	positive	male	oral tongue	yes	AG
tcga-ba-4076	39	negative	yes	10.3493	no	13.63	1	large	positive	male	larynx and hypopharynx		GG
tcga-ba-4077	45	positive	yes	10.2509	no	36	0	large	positive	female	oropharynx	no	AA
tcga-ba-4078	83	negative	yes	9.26348	no	9.07	1	small	positive	male	larynx and hypopharynx		AG
tcga-ba-5149	47	negative	yes	9.88673	no	26.48	1	large	positive	male	oral cavity	yes	AG
tcga-ba-5151	72	negative	yes	9.64434	no	23.72	0	large	negative	male	oral cavity	no	AG
tcga-ba-5152	56	negative	no	8.97405	no	36	0	large	negative	male	oral cavity	no
tcga-ba-5153	51	positive	no	8.07022	no	36	0	small	positive	male	oropharynx	no	AG
tcga-ba-5555	54	negative	yes	8.26791	no	17.08	0	small	positive	male	larynx and hypopharynx	no	AG
tcga-ba-5556	58	negative	yes	10.5236	no	23.82	0	small	negative	female	oral cavity	yes	AA
tcga-ba-5557	41	negative	no	9.93215	no	20.47	0	small	positive	female	oral tongue	no	GG
tcga-ba-5558	65	negative	no	9.93264	no	36	0	large	positive	male	oral cavity	no	AG
tcga-ba-5559	71	positive	no	7.91895	no	36	0	large	positive	male	oropharynx	no	AG
tcga-ba-6868	53	negative	yes	12.3713	no	15.51	1	large	positive	male	larynx and hypopharynx
tcga-ba-6869	62	negative	yes	8.0862	no	21.16	0	large	negative	male	larynx and hypopharynx	yes	AG
tcga-ba-6870	60	negative	yes	10.1404	no	14.82	1	large	positive	female	larynx and hypopharynx	no
tcga-ba-6871	75	negative	yes	9.26395	no	3.55	1	large	positive	male	oropharynx
tcga-ba-6872	47	negative	yes	10.5251	no	12.61	1	large	positive	male	oral cavity	yes	AG
tcga-ba-6873	28	negative	yes	11.7726	no	4.01	0	small	positive	male	oral tongue	no	AG
tcga-ba-7269	61	negative	yes	9.78846	no	36	0	small	positive	male	oral tongue	yes
tcga-ba-a4if	59	negative	yes	8.56373	no	29.4	0	large	negative	male	oropharynx
tcga-ba-a4ig	77	positive	yes	8.50869	no	28.09	0	small	positive	male	oropharynx
tcga-ba-a4ih	57	positive	yes	8.86823	no	20.43	0	small	positive	male	oropharynx	yes	AA
tcga-ba-a4ii	46	negative	yes	9.66889	no	30.16	0	small	negative	male	oropharynx
tcga-ba-a6d8	59	negative	yes	8.77596	no	27.92	0	large	positive	male	oral cavity
tcga-ba-a6da	41	negative	yes	9.82953	no	11.53	0	large	positive	female	larynx and hypopharynx	no
tcga-ba-a6db	24	negative	no	9.05806	no	7.1	0	small	negative	female	oral tongue	no
tcga-ba-a6dd	44	negative	yes	9.76322	no	5.68	1	large	positive	male	oral cavity	yes
tcga-ba-a6de	70	negative	yes	8.82939	no	14.45	0	large	negative	female	oral tongue	no
tcga-ba-a6df	80	negative			no	7.82	1	large	positive	female	oral cavity	no
tcga-ba-a6dg	49	negative	yes	11.0748	no	2.27	1	large	positive	male	oral tongue	yes
tcga-ba-a6di	62	negative	yes	9.86719	no	11.04	1	large	negative	male	larynx and hypopharynx	yes
tcga-ba-a6dj	62	negative	yes	9.55962	no	13.37	1	large	positive	male	oral cavity	no
tcga-ba-a6dl	59	negative	yes	8.67572	no	20.47	0	large	negative	male	oropharynx	yes
tcga-ba-a8yp	50	negative	yes	8.78525	no	16.39	0	large	positive	male	oropharynx	no
tcga-bb-4217	68	negative	yes	9.83517	no	6.14	0	large	positive	male	larynx and hypopharynx	yes
tcga-bb-4223	48	positive	no	7.86167	no	36	0	large	positive	male	oropharynx		AA
tcga-bb-4224	52	negative	no	9.09407	no	9.13	0	large	negative	male	oral tongue	no	AG
tcga-bb-4225	73	positive	yes	8.1981	no	4.8	0	large	positive	male	oropharynx	no	AA
tcga-bb-4227	66	negative	yes	9.92175	no	4.4	0	large	positive	male	larynx and hypopharynx	yes
tcga-bb-4228	50	positive	yes	8.19696	no	18.36	0	small	negative	male	oropharynx		AA
tcga-bb-7861	56	positive	yes	8.43758	no	22.4	0		positive	male	oropharynx
tcga-bb-7862	67	negative	yes	9.13347	no	36	0	small	positive	male	larynx and hypopharynx
tcga-bb-7863	43	negative	no	10.4204	no	33.67	0	large	negative	female	oral tongue	no
tcga-bb-7864	61	positive	yes	8.13047	no	36	0	large	positive	male	larynx and hypopharynx
tcga-bb-7866	40	positive	yes	8.13803	no	36	0	large	positive	male	oropharynx
tcga-bb-7870	58	negative	yes	7.96846	no	36	0	large	positive	male	larynx and hypopharynx	yes
tcga-bb-7871	64	negative	yes	10.1158	no	24.64	0	large	positive	female	oropharynx	no
tcga-bb-7872	63	negative	no	12.0584	no	36	0	small	positive	male	oral tongue
tcga-bb-8596	69	negative	yes	10.1575	no	36	0	large	positive	female	larynx and hypopharynx	yes
tcga-bb-8601	84	negative	yes	9.65302	no	20.5	0	small	negative	male	oral cavity	no
tcga-bb-a5hu	47	negative	no	11.5049	no	25.69	0	large	positive	male	oral cavity	no
tcga-bb-a5hy	64	negative	yes	12.1099	no	10.55	1	large	positive	male	larynx and hypopharynx
tcga-bb-a5hz	65	negative	no	9.45165	no	27.17	0	large	positive	male	oral cavity	no
tcga-bb-a6um	52	positive	yes	8.32204	no	12.91	0	small	positive	male	oropharynx
tcga-bb-a6uo	61	negative	yes	10.975	no	8.8	1	large	positive	female	oral tongue
tcga-c9-a47z	72	negative	no	10.9901	no	6.27	1	small	positive	female	oral tongue
tcga-c9-a480	45	negative	no	10.4716	no	12.68	0	large	negative	female	oral tongue
tcga-cn-4722	61	negative	yes	10.1005	no	36	0	small	negative	female	larynx and hypopharynx		AA
tcga-cn-4723	67	negative	yes	11.119	no	36	0	large	negative	male	larynx and hypopharynx
tcga-cn-4725	60	negative	no	9.384	no	36	0	small	negative	male	oral tongue		AA
tcga-cn-4726	68	negative	yes	10.7382	no	4.66	1	large	positive	male	oral cavity
tcga-cn-4727	56	negative	yes	9.14098	no	36	0	large	negative	male	larynx and hypopharynx		AG
tcga-cn-4728	56	negative	yes	9.35851	no	36	0	small	positive	male	oral cavity	yes
tcga-cn-4729	73	negative	yes	8.93378	no	12.88	0	large	negative	male	oral cavity	yes	GG
tcga-cn-4730	62	negative	yes	9.49299	no	26.84	0	large	positive	male	oral cavity		AG
tcga-cn-4731	63	negative	yes	8.97475	no	32.79	1	large	positive	female	oral cavity		AA
tcga-cn-4733	61	negative	no	10.8408	no	36	0	small	negative	male	oral tongue		GG
tcga-cn-4734	70	negative	yes	10.3778	no	36	0	small	negative	male	oral cavity		AA
tcga-cn-4735	52	negative	yes	9.24628	no	36	0	large	positive	male	larynx and hypopharynx	yes	AG
tcga-cn-4736	70	negative	yes	9.20304	no	12.98	1	small	negative	female	oral tongue	yes	AA
tcga-cn-4737	19	negative	no	10.0171	no	20.53	0	small	negative	male	oral tongue		AG
tcga-cn-4738	53	negative	yes	10.0165	no	14.32	1	large	negative	male	larynx and hypopharynx	yes	AA
tcga-cn-4739	71	negative	yes	8.30448	no	36	0	large	negative	male	larynx and hypopharynx		AA
tcga-cn-4740	79	negative	yes	9.40992	no	27.56	1	large	negative	female	oral cavity		AA
tcga-cn-4741	75	positive	yes	9.30854	no	36	0	large	negative	male	oral cavity		AA
tcga-cn-4742	48	negative	yes	9.88858	no	13.04	1	large	positive	female	oral tongue		AG
tcga-cn-5355	64	negative	yes	10.8436	no	36	0	large	negative	male	larynx and hypopharynx	no	AG
tcga-cn-5356	56	negative	yes	9.07805	no	36	0	large	negative	male	larynx and hypopharynx		AG
tcga-cn-5358	60	negative	yes	9.32193	no	8.57	1	small	positive	male	oral cavity	no
tcga-cn-5359	59	negative	yes	9.70332	no	12.39	1	large	positive	male	oral cavity
tcga-cn-5360	68	negative	yes	8.01072	no	36	0	large	negative	male	larynx and hypopharynx		AG
tcga-cn-5361	80	negative	yes	11.0513	no	36	0			male	larynx and hypopharynx		AG
tcga-cn-5363	48	negative	yes	10.5611	no	8.31	1	large	positive	male	larynx and hypopharynx		GG
tcga-cn-5364	55	negative	yes	10.0988	no	16.2	1	large	positive	male	oral cavity		AG
tcga-cn-5365	38	negative	yes	10.6858	no	11.53	1	small	positive	male	oropharynx		GG
tcga-cn-5366	51	negative	yes	10.8725	no	11.83	1	large	positive	male	larynx and hypopharynx	yes	AG
tcga-cn-5367	60	negative	yes	10.3629	no	11.56	1	large	negative	female	oral tongue		AA
tcga-cn-5369	90	negative	yes	9.80773	no	12.48	1	large	positive	female	oral cavity		AA
tcga-cn-5370	78	negative	yes	10.7336	no	8.51	1	small	negative	male	oral tongue
tcga-cn-5373	55	negative	yes	11.3243	no	36	0	small	negative	female	oral cavity		AA
tcga-cn-5374	56	positive	yes	10.2552	no	36	0	small	positive	female	oropharynx		AA
tcga-cn-6010	53	negative	yes	8.51142	no	36	0	large	negative	male	larynx and hypopharynx	yes
tcga-cn-6011	57	negative	yes	9.88582	no	30.65	0	large	negative	male	oral cavity		AA
tcga-cn-6012	66	negative	yes	8.57321	no	36	0	large	positive	male	larynx and hypopharynx
tcga-cn-6013	56	negative	no	9.84811	no	23.88	1	large	positive	male	oral cavity		GG
tcga-cn-6016	64	negative	yes	10.7408	no	36	0	large	positive	male	oral cavity	yes
tcga-cn-6017	55	negative	no	9.89639	no	28.02	1	small	positive	male	oral tongue	yes	GG
tcga-cn-6018	85	negative	no	12.4209	no	19.05	1	large	positive	female	oral cavity		GG
tcga-cn-6019	61	negative	yes	9.74689	no	34.1	0	large	negative	male	oral tongue	yes	AA
tcga-cn-6020	58	negative	yes	8.91629	no	6.73	1	large	positive	male	oral cavity
tcga-cn-6021	63	negative	yes	8.85662	no	9.07	1	large	negative	female	larynx and hypopharynx
tcga-cn-6022	49	negative	yes	11.744	no	9.23	1	large	positive	male	larynx and hypopharynx
tcga-cn-6023	73	negative	yes	8.35379	no	36	0	large	negative	male	larynx and hypopharynx
tcga-cn-6024	66	negative	yes	9.03249	no	11.07	1	large	positive	male	oral tongue
tcga-cn-6988	47	negative	yes	7.97218	no	10.45	0	large	positive	male	larynx and hypopharynx	yes
tcga-cn-6989	64	negative	yes	9.95833	no	32.19	1	large	positive	male	larynx and hypopharynx	yes	AA
tcga-cn-6992	61	negative	yes	9.43434	no	35.02	0	large	positive	male	larynx and hypopharynx	yes
tcga-cn-6994	67	negative	yes	10.0359	no	36	0	large	positive	male	oral cavity		AA
tcga-cn-6995	78	negative	yes	9.7831	no	3.68	1	large	positive	male	oral cavity
tcga-cn-6996	58	negative	no	9.99304	no	17.41	1	large	positive	female	oral tongue		AG
tcga-cn-6997	66	negative	yes	9.45701	no	32.46	1	large	positive	male	larynx and hypopharynx
tcga-cn-6998	53	negative	yes	10.3573	no	11.73	1	large	positive	male	oral tongue		AA
tcga-cn-a497	63	negative	yes	8.51716	no	34.99	0	small	positive	male	larynx and hypopharynx
tcga-cn-a498	61	negative	yes	10.4528	no	25.39	1	small	negative	female	oropharynx
tcga-cn-a499	60	positive	no	9.30753	no	23.55	0	small	negative	female	oropharynx	no
tcga-cn-a49a	60	negative	no	10.1653	no	17.28	1	large	negative	male	oral cavity	no
tcga-cn-a49b	71	negative	yes	9.40365	no	29.7	0	large	positive	male	larynx and hypopharynx	yes
tcga-cn-a49c	67	positive	yes	10.2549	no	21.19	0	large	positive	male	oropharynx
tcga-cn-a63t	60	negative	yes	9.47892	no	7.39	0	large	positive	male	larynx and hypopharynx	yes
tcga-cn-a63u	50	negative	yes	7.21783	no	31.67	0	large	negative	male	larynx and hypopharynx
tcga-cn-a63v	59	negative	yes	11.1826	no	22.31	0	large	negative	male	oral cavity
tcga-cn-a63w	48	negative	yes	9.99576	no	12.39	1	large	positive	female	larynx and hypopharynx	no
tcga-cn-a63y	46	negative	no		no	16.56	0	small	negative	male	oropharynx
tcga-cn-a640	40	negative	no		no	4.4	1	large	positive	female	oral tongue	no
tcga-cn-a641	47	negative	yes	8.491	no	12.06	0	large	positive	male	larynx and hypopharynx	no
tcga-cn-a642	57	negative	yes	10.9918	no	2.69	1	large	positive	male	oral cavity	no
tcga-cn-a6uy	57	positive	yes	7.79904	no	23.42	0	large	positive	male	oropharynx
tcga-cn-a6v1	59	negative	no	7.3704	no	19.81	0	small	positive	male	oropharynx
tcga-cn-a6v3	61	negative	yes	10.2627	no	24.38	0	large	positive	male	larynx and hypopharynx	yes
tcga-cn-a6v6	59	positive	yes	8.41127	no	20.86	0	small	positive	male	oropharynx	yes
tcga-cn-a6v7	40	positive	no	7.86544	no	19.51	0	small	positive	male	oropharynx
tcga-cq-5323	82	positive	yes	9.29265	no	36	0	large	negative	male	oral cavity	yes	AG
tcga-cq-5324	59	negative	yes	10.5536	no	36	0	large	positive	male	oral cavity
tcga-cq-5325	65	negative	yes	10.4513	no	21.48	1	small	negative	male	oral tongue	yes	AA
tcga-cq-5326	67	negative	yes	10.8446	no	2.92	1	large	positive	male	oral cavity	no
tcga-cq-5327	61	negative	no	10.8109	no	36	0	large	positive	female	oral tongue		AG
tcga-cq-5329	46	negative	no	10.0404	no	36	0	large	positive	female	oral tongue		AA
tcga-cq-5330	69	negative	yes	11.6796	no	36	0	large	positive	female	oral tongue		AA
tcga-cq-5331	73	negative	yes	9.23397	no	36	0	large	negative	female	oral cavity
tcga-cq-5332	87	negative	yes	9.43765	no	10.41	1	large	negative	male	oral cavity
tcga-cq-5333	74	negative	yes	10.3307	no	11.2	1	small	negative	male	oral tongue
tcga-cq-5334	87	negative	yes	10.1242	no	4.24	1	large	positive	male	oral cavity
tcga-cq-6218	52	negative	yes	11.0881	no	36	0	large	negative	female	oral cavity
tcga-cq-6219	50	negative	yes	11.9065	no	15.74	1	large	positive	female	oral tongue	yes	AG
tcga-cq-6220	69	negative	no	10.3061	no	32.36	1	small	positive	male	oral cavity		GG
tcga-cq-6221	79	negative	yes	9.17047	no	32.85	0	small	negative	male	oral tongue	yes	AA
tcga-cq-6222	63	negative	yes	9.33932	no	36	0	large	positive	male	oral tongue
tcga-cq-6223	69	negative	yes	9.17008	no	36	0	large	negative	male	oral cavity		AG
tcga-cq-6224	52	negative	yes	10.5884	no	36	0	small	negative	male	oral tongue	no	AA
tcga-cq-6225	65	negative	yes	8.52488	no	13.24	1	small	negative	male	oral tongue		AG
tcga-cq-6227	77	negative	yes	10.5066	no	4.24	1	large	positive	male	oral cavity	yes
tcga-cq-6228	71	negative	yes	7.44505	no	14.98	1	small	positive	female	oral cavity		AG
tcga-cq-6229	61	negative	no	11.2104	no	36	0	small	positive	male	oral tongue		AA
tcga-cq-7063	59	negative	no	11.6514	no	36	0			female	oral cavity	no
tcga-cq-7064	83	negative	no		no	36	0	large	positive	female	oral cavity	no
tcga-cq-7065	40	negative	no	9.15794	no	36	0	small	negative	male	oral tongue		AA
tcga-cq-7067	75	negative		11.2387	no	16.72	0	small	negative	female	oral tongue
tcga-cq-7068	80	negative	no	11.2319	no	36	0	small	negative	female	oral cavity		AG
tcga-cq-7069	77	negative	no	9.70202	no	36	0	small	negative	female	oral cavity	no
tcga-cq-7071	76	negative	no	9.92438	no	36	0	large	positive	female	oral cavity	no
tcga-cq-7072	51	negative	yes	10.5541	no	36	0	large	negative	male	oral cavity	yes
tcga-cq-a4c6	63	negative	yes	11.2548	no	36	0	small	negative	male	oral cavity	no
tcga-cq-a4c7	88	negative	yes	11.0409	no	11.6	1	small	negative	male	oral cavity	no
tcga-cq-a4c9	56	negative	yes	8.23916	no	23.23	0			male	oral cavity
tcga-cq-a4ca		negative	yes	10.2362	no	0	0	small	negative	male	oral tongue
tcga-cq-a4cb	59	negative	yes	10.0479	no	29.34	0	small	negative	male	oral cavity	yes
tcga-cq-a4cd	69	negative	no	10.0849	no	33.57	0	large	negative	male	oral cavity	no
tcga-cq-a4ce	76	negative	no	10.0658	no	29.47	0	small	negative	female	oral tongue	no
tcga-cq-a4cg	78	negative	yes	11.0216	no	14.13	1	small	negative	female	oral cavity	no
tcga-cq-a4ch	58	negative	no	10.7703	no	12.45	1	large	positive	male	oral tongue	no
tcga-cq-a4ci	73	negative	yes	9.59153	no	31.21	0			male	oral cavity	no
tcga-cr-5243	51	positive	no	8.27573	no	36	0	large	positive	male	oropharynx	no	AA
tcga-cr-5247	48	negative	yes	9.97209	no	11.76	0	large	positive	male	oropharynx
tcga-cr-5248	53	positive	yes	7.33299	no	36	0	large	positive	male	oropharynx		AA
tcga-cr-5249	35	positive	no	9.35898	no	36	0	small	negative	female	oropharynx	no	AG
tcga-cr-5250	71	positive	yes	9.24869	no	26.25	0	small	negative	male	oropharynx		AA
tcga-cr-6467	59	positive	yes	7.75389	no	36	0	small	positive	male	oropharynx	yes	AG
tcga-cr-6470	38	positive	no	8.46727	no	36	0	small	positive	male	oropharynx	no	GG
tcga-cr-6471	58	positive	yes	9.51499	no	36	0	large	negative	male	oral cavity		AA
tcga-cr-6472	59	positive	no	8.44853	no	34.49	0	small	positive	male	oropharynx	no	AA
tcga-cr-6473	68	positive	yes	8.02911	no	36	0	large	positive	male	larynx and hypopharynx		GG
tcga-cr-6474	51	negative	yes	9.70835	no	18.53	1	large	positive	male	larynx and hypopharynx
tcga-cr-6477	56	negative	yes	9.58579	no	16.89	0	large	positive	female	oropharynx
tcga-cr-6478	66	negative	yes	9.75483	no	6.01	1	large	positive	female	oropharynx	no
tcga-cr-6480	53	positive	no	8.29303	no	11.89	0	small	positive	male	oropharynx		AA
tcga-cr-6481	47	positive	no	8.52455	no	10.22	0	small	positive	male	oropharynx		AG
tcga-cr-6482	62	positive	yes	8.33913	no	11.33	0	small	positive	male	oropharynx		GG
tcga-cr-6484	67	negative	no	9.02825	no	11.63	0	large	negative	female	oral cavity
tcga-cr-6487	50	positive	yes	7.71277	no	7.69	0	small	negative	male	oropharynx		AG
tcga-cr-6488	68	negative	no	10.496	no	12.45	0	small	negative	female	oral tongue
tcga-cr-6491	60	negative	yes	8.91162	no	22.77	0	large		male	oral cavity	yes	AG
tcga-cr-6492	78	negative	yes	10.7274	no	15.74	0	large	positive	male	oral cavity
tcga-cr-6493	69	negative	yes	10.1239	no	9.26	1	large	positive	male	oral tongue
tcga-cr-7364	66	negative	yes	9.04793	no	36	0	large	negative	male	larynx and hypopharynx
tcga-cr-7365	60	negative	yes	9.50615	no	36	0	large	positive	male	oral cavity
tcga-cr-7367	52	negative	yes	10.2468	no	36	0	large	positive	male	oral cavity	yes
tcga-cr-7368	54	positive	yes	8.10259	no	36	0	large	negative	male	oral cavity		AG
tcga-cr-7369	59	positive	yes	10.2701	no	35.81	1	large	negative	male	oral cavity		AG
tcga-cr-7370	72	negative	yes	8.86723	no	3.45	0	small	negative	female	larynx and hypopharynx
tcga-cr-7371	45	negative	yes	9.59785	no	3.09	1	large	negative	female	larynx and hypopharynx
tcga-cr-7372	45	negative	no	10.4728	no	24.93	0	small	negative	male	oral tongue
tcga-cr-7373	66	negative	yes	9.70289	no	29.2	0	large	positive	male	oral cavity
tcga-cr-7374	67	negative	yes	9.01368	no	0.99	0	small	negative	female	larynx and hypopharynx
tcga-cr-7376	83	negative	yes	10.2601	no	31.93	0	small	negative	male	oral cavity
tcga-cr-7377	58	negative	yes	9.77931	no	9.17	1	large	positive	male	oral cavity
tcga-cr-7379	78	negative	no	11.0239	no	34.03	0	large	positive	female	oral cavity
tcga-cr-7380	58	negative	no	11.1504	no	19.91	1	large	negative	male	oral cavity	no
tcga-cr-7382	49	negative	no	10.8199	no	26.15	0	small	positive	male	oral tongue		AA
tcga-cr-7383	79	negative	yes	10.526	no	17.12	1	small	negative	female	oropharynx
tcga-cr-7385	42	positive	no	8.46714	no	32.75	0	small	positive	male	oropharynx		AA
tcga-cr-7386	69	negative	yes	10.6148	no	36	0	large	positive	male	oral cavity	no
tcga-cr-7388	70	negative	yes	9.24845	no	27.04	1	small	positive	female	larynx and hypopharynx
tcga-cr-7389	55	negative	yes	9.5272	no	12.88	0	small	positive	male	larynx and hypopharynx	no
tcga-cr-7390	67	negative	yes	9.52588	no	36	0	large	negative	male	oral tongue	yes
tcga-cr-7391	36	negative	yes	9.38621	no	29.99	0	small	negative	female	oral tongue		GG
tcga-cr-7392	67	negative	yes	10.1237	no	36	0	large	positive	female	oral tongue
tcga-cr-7393	26	negative	no	9.24452	no	32.62	0	small	negative	male	oral tongue
tcga-cr-7394	70	negative	yes	9.3977	no	36	0	large	positive	male	oral tongue
tcga-cr-7395	80	negative	yes	10.0399	no	30.55	0	small	negative	female	oral cavity
tcga-cr-7397	44	negative	yes	9.96924	no	24.77	0	large	positive	male	oral tongue	no
tcga-cr-7398	53	negative	yes	9.10726	no	5.12	0	small	negative	female	larynx and hypopharynx
tcga-cr-7399	60	negative	yes	9.75683	no	5.95	0	large	positive	female	larynx and hypopharynx
tcga-cr-7401	64	negative	yes	9.9889	no	35.38	0	small	negative	male	oral tongue
tcga-cr-7402	68	negative	yes	7.88857	no	29.93	0	large	negative	male	larynx and hypopharynx
tcga-cr-7404	53	positive	no	8.72605	no	36	0	large	positive	male	oropharynx		GG
tcga-cv-5430	61	negative	yes	8.25538	no	36	0	large	positive	male	larynx and hypopharynx
tcga-cv-5431	73	negative	yes	9.84388	no	17.15	1	large	positive	male	larynx and hypopharynx	yes	AG
tcga-cv-5432	68	negative	yes	10.0614	no	36	0	large	negative	male	larynx and hypopharynx		GG
tcga-cv-5434	60	negative	yes	8.65792	no	36	0	large	positive	male	larynx and hypopharynx
tcga-cv-5435	57	negative	yes	10.5824	no	36	0	large	negative	male	larynx and hypopharynx	yes
tcga-cv-5436	65	negative	yes	9.6115	no	19.19	1	large	positive	male	oral cavity	yes
tcga-cv-5439	62	negative	yes	10.1048	no	17.94	1	small	negative	male	oropharynx		AG
tcga-cv-5440	52	negative	yes	9.59391	no	36	0	large	positive	male	larynx and hypopharynx	yes
tcga-cv-5441	58	negative	yes	10.26	no	36	0	large	positive	male	larynx and hypopharynx	yes
tcga-cv-5442	76	positive	yes	9.52969	no	36	0	large	positive	female	oral cavity		AG
tcga-cv-5443	63	positive	yes	8.76233	no	36	0	large	positive	male	larynx and hypopharynx		AG
tcga-cv-5444	64	negative	yes	9.60641	no	36	0	large	negative	male	larynx and hypopharynx	no
tcga-cv-5966	63	negative	yes	9.69694	no	17.9	1	large	positive	female	oral cavity	yes	AA
tcga-cv-5970	59	negative	yes	9.94917	no	13.34	1	large	positive	male	oral tongue		AA
tcga-cv-5971	60	positive	yes	8.50231	no	23.03	0	small	positive	male	oral tongue		AA
tcga-cv-5973	62	negative	no	10.3225	no	36	0	large	negative	female	oral tongue		AA
tcga-cv-5976	50	negative	yes	11.6789	no	36	0	large	positive	male	oral tongue		AG
tcga-cv-5977	66	negative	yes	11.0441	no	36	0	large	positive	male	oral tongue	no	AG
tcga-cv-5978	53	negative	yes	10.1985	no	7.06	1	large	positive	female	larynx and hypopharynx
tcga-cv-5979	26	negative	no	10.2121	no	36	0	large	positive	male	oral tongue
tcga-cv-6003	50	negative	no	10.4116	no	36	0	small	negative	female	oral tongue	yes	AA
tcga-cv-6433	57	positive	yes	7.99514	no	21.06	0	small	negative	male	oral tongue	yes	AA
tcga-cv-6436	62	negative	no	9.49325	no	36	0	large	negative	male	oral tongue
tcga-cv-6441	60	negative	yes	6.8258	no	9.59	1	large	negative	male	oral tongue	yes	AA
tcga-cv-6933	53	negative	yes	10.128	no	36	0	large	negative	male	oral tongue	no	GG
tcga-cv-6934	66	negative	yes	10.1701	no	2.14	1	large	positive	female	oral tongue
tcga-cv-6935	67	negative	yes	9.41083	no	9.69	1	large	negative	male	larynx and hypopharynx	no
tcga-cv-6936	68	negative	yes	11.0206	no	5.45	1	large	positive	male	oral cavity	no
tcga-cv-6937	71	negative	yes	10.1644	no	20.5	1	small	negative	male	oral cavity
tcga-cv-6938	87	negative	yes	10.7314	no	4.73	1	small	negative	male	oral cavity		AG
tcga-cv-6939	60	positive	no	8.81762	no	21.88	1	large	positive	male	oral tongue		AG
tcga-cv-6940	80	negative	yes	10.0427	no	26.41	1	small	negative	female	oral cavity
tcga-cv-6941	51	negative	yes	9.0251	no	11.24	1	large	negative	male	oral tongue
tcga-cv-6942	73	negative	no	10.2826	no	36	0	small	negative	female	oral cavity
tcga-cv-6943	74	negative	yes	11.1133	no	19.78	1	large	negative	male	oropharynx	yes
tcga-cv-6945	41	negative	yes	10.854	no	12.02	1	large	positive	male	oral tongue		AA
tcga-cv-6948	79	negative		8.32227	no	36	0	large	negative	female	oral cavity
tcga-cv-6950	64	negative	yes	11.1799	no	15.08	1	large	positive	male	oropharynx	yes
tcga-cv-6951	57	negative	yes	9.56008	no	30.06	1	large	positive	male	oral tongue	yes	AG
tcga-cv-6952	65	negative	yes	10.8393	no	6.08	1	large	negative	female	oral tongue	yes	AG
tcga-cv-6953	80	negative	no	7.91007	no	36	0	large	negative	female	oral cavity
tcga-cv-6954	59	negative	yes	10.3923	no	36	0	large	positive	male	oral tongue	yes	GG
tcga-cv-6955	74	negative	no	8.85962	no	10.97	1	small	negative	female	oral cavity
tcga-cv-6956	67	negative	yes	9.1405	no	7.13	1	large	positive	male	oral tongue		AG
tcga-cv-6959	48	negative	no	10.07	no	8.41	1	large	positive	male	oral tongue	yes	AA
tcga-cv-6960	49	negative	yes	11.6621	no	28.32	1	large	negative	male	oral cavity	yes	AG
tcga-cv-6961	61	positive	yes	9.72449	no	2.5	1	small	negative	male	oral tongue	yes	AA
tcga-cv-6962	65	negative	yes	8.27386	no	4.14	1	large	negative	male	larynx and hypopharynx
tcga-cv-7089	74	negative	yes	9.62405	no	36	0	large	positive	male	larynx and hypopharynx	no
tcga-cv-7090	39	negative		9.56637	no	36	0	small	negative	male	oral cavity
tcga-cv-7091	54	negative	yes	9.96536	no	36	0	small	negative	male	oral cavity	yes	AG
tcga-cv-7095	87	negative	yes	9.83763	no	18.79	1	small	positive	female	oral cavity		AA
tcga-cv-7097	53	negative	yes	9.97123	no	12.65	1	large	negative	male	oral cavity	yes
tcga-cv-7099	85	negative	yes	10.3163	no	7.98	1	small	negative	female	oral cavity
tcga-cv-7100	66	positive	yes	9.19663	no	9	1	small	negative	male	oral cavity		AA
tcga-cv-7101	80	negative	yes	7.88925	no	5.26	1	small	negative	male	larynx and hypopharynx	yes
tcga-cv-7102	76	negative	yes	9.60456	no	1.84	1	large	positive	female	oral cavity	yes
tcga-cv-7103	49	negative	yes	9.15669	no	36	0	small	negative	male	oral tongue	yes
tcga-cv-7104	61	negative	no	10.6947	no	12.91	1	small	positive	female	oral tongue
tcga-cv-7177	82	negative		10.2143	no	21.78	1	small	negative	female	larynx and hypopharynx
tcga-cv-7178	64	negative	yes	9.69837	no	36	0	large	positive	female	oral cavity	no	AG
tcga-cv-7180	34	negative	yes	8.94254	no	10.74	1	small	negative	male	oral tongue	no	AG
tcga-cv-7183	53	negative	yes	9.4332	no	36	0	small	negative	male	oral cavity		AG
tcga-cv-7235	67	negative	yes	8.52407	no	36	0	large	negative	male	oral cavity	yes
tcga-cv-7236	77	negative		11.7029	no	4.73	1	small	positive	female	oral tongue
tcga-cv-7238	69	negative	no	11.7082	no	36	0	small	negative	female	oral tongue		AG
tcga-cv-7242	60	negative	yes	8.72076	no	35.97	0	large	negative	female	larynx and hypopharynx	yes
tcga-cv-7243	50	negative	no	10.251	no	31.34	0	small	negative	male	oral tongue	yes
tcga-cv-7245	62	negative	yes	9.93819	no	26.18	0	large	negative	male	larynx and hypopharynx
tcga-cv-7247	55	negative	no	9.93217	no	18.96	1	small	negative	male	larynx and hypopharynx		AA
tcga-cv-7248	63	negative	yes	9.59774	no	17.12	1	large	positive	female	larynx and hypopharynx
tcga-cv-7250	64	negative	yes	9.86931	no	36	0	large	negative	male	larynx and hypopharynx
tcga-cv-7252	62	negative	no	10.0256	no	4.96	1	large	negative	female	oral cavity
tcga-cv-7253	58	negative		8.45159	no	11.86	1	small	negative	male	oral cavity
tcga-cv-7254	55	negative	yes	8.64476	no	36	0	small	negative	male	oral cavity	yes
tcga-cv-7255	32	negative	no	10.2172	no	2.1	1	small	negative	female	oral tongue		AG
tcga-cv-7261	57	negative	yes	8.62674	no	36	0	large	negative	male	larynx and hypopharynx
tcga-cv-7263	64	negative	yes	8.05331	no	18.4	1	small		male	oral cavity		AG
tcga-cv-7406	49	positive	yes	8.67207	no	36	0	small	negative	male	oropharynx	yes	AA
tcga-cv-7407	67	negative	no	9.7036	no	35.51	1	small	negative	female	oral cavity		AG
tcga-cv-7409	43	negative		8.70458	no	17.84	1	large	positive	male	oral cavity
tcga-cv-7410	61	negative	yes	9.61464	no	36	0	small	negative	male	larynx and hypopharynx
tcga-cv-7411	64	negative	yes	9.95128	no	36	0	large	negative	female	oral cavity		AG
tcga-cv-7413	74	negative		10.4137	no	9.66	1	small	negative	female	oral cavity
tcga-cv-7414	78	negative	yes	8.19705	no	0.46	1	large	positive	male	oral cavity		AG
tcga-cv-7415	60	negative		11.771	no	22.83	1	large	negative	male	larynx and hypopharynx
tcga-cv-7416	29	negative	no	9.07904	no	25.07	1	large	negative	female	oral cavity		AG
tcga-cv-7418	62	negative	yes	8.25498	no	25.92	1	large	negative	male	larynx and hypopharynx	yes
tcga-cv-7421	76	negative	yes	8.69646	no	0.07	1	large	negative	male	larynx and hypopharynx
tcga-cv-7422	60	negative	yes	7.69342	no	34.07	1	large	positive	female	larynx and hypopharynx
tcga-cv-7423	65	negative	yes	10.1957	no	36	0	small	negative	male	oral cavity
tcga-cv-7424	67	negative	yes	8.23303	no	14.88	1	large	positive	male	larynx and hypopharynx
tcga-cv-7425	77	negative	no	9.89344	no	36	0	large	negative	female	oral cavity
tcga-cv-7427	73	negative	yes	10.7803	no	36	0	small	negative	female	oral cavity	yes
tcga-cv-7428	47	negative	yes	10.0434	no	36	0	large	positive	male	oral cavity	yes	AG
tcga-cv-7429	55	negative	yes	11.7912	no	3.52	1	large	negative	male	oral cavity		GG
tcga-cv-7430	56	negative	yes	10.1342	no	16.26	1	large	negative	male	larynx and hypopharynx
tcga-cv-7432	79	negative	yes	9.30679	no	36	0	small	positive	male	oral cavity		GG
tcga-cv-7433	49	negative	yes	11.883	no	19.74	1	large	positive	male	larynx and hypopharynx
tcga-cv-7434	64	negative	yes	11.1621	yes	7.16	1	large	negative	male	oral cavity	yes	GG
tcga-cv-7435	57	negative	yes	9.59261	no	36	0	large	positive	female	oral cavity
tcga-cv-7437	77	negative	no	8.79639	no	16.62	1	small	negative	male	larynx and hypopharynx
tcga-cv-7438	87	negative	no	12.1066	no	6.37	1	small	negative	female	oral tongue
tcga-cv-7440	38	negative	yes	12.0479	no	22.17	1	small	negative	male	larynx and hypopharynx
tcga-cv-7446	66	negative	yes	9.20908	no	35.91	1	small	negative	male	oral tongue	no
tcga-cv-7568	48	negative	yes	8.1837	no	30.45	1	large	negative	female	oral cavity
tcga-cv-a45o	57	negative	yes	10.4695	no	27.96	0	large	negative	male	oral cavity
tcga-cv-a45p	82	negative	no	9.80045	no	20.99	0	small	negative	female	oral tongue
tcga-cv-a45q	69	negative	yes	8.25504	no	36	0	large	positive	female	oral cavity
tcga-cv-a45r	46	negative	yes	10.9285	no	36	0	large	positive	male	oral tongue
tcga-cv-a45t	64	negative	yes	9.6774	no	36	0	small	negative	female	oral tongue
tcga-cv-a45u	59	negative	yes	9.13599	no	35.45	1	large	negative	male	oral cavity
tcga-cv-a45v	87	negative	no	9.5563	no	1.05	1	large	negative	female	oral cavity
tcga-cv-a45w	75	negative	yes	8.00652	no	36	0	large	negative	male	larynx and hypopharynx
tcga-cv-a45x	47	negative	yes	9.83701	no	6.5	1	large	positive	male	oral cavity
tcga-cv-a45y	61	negative	yes	10.8827	no	36	0	large	negative	male	larynx and hypopharynx
tcga-cv-a45z	75	negative	yes	9.18778	no	36	0	small	negative	male	larynx and hypopharynx
tcga-cv-a460	72	negative	yes	9.06997	no	36	0	large	positive	male	larynx and hypopharynx
tcga-cv-a461	65	negative	yes	8.07509	no	36	0	large	negative	male	larynx and hypopharynx
tcga-cv-a463	82	negative	no	9.65094	no	0.76	1	large	negative	female	oral cavity
tcga-cv-a464	48	negative	yes	10.3228	no	36	0	large	negative	male	oral cavity
tcga-cv-a465	24	negative	no	10.5255	no	7.06	1	small	negative	male	oral tongue
tcga-cv-a468	42	negative	yes	8.90237	no	15.24	1	large	positive	male	oral cavity
tcga-cv-a6jd	82	negative	yes	11.9052	no	5.98	1	large	negative	female	oral cavity
tcga-cv-a6je	78	negative	yes	8.44813	no	35.32	0	small	negative	male	oral cavity	yes
tcga-cv-a6jm	85	negative	no	10.7033	no	6.37	1	large	negative	male	larynx and hypopharynx
tcga-cv-a6jn	53	negative	yes	10.2746	no	29.76	0	small	negative	male	oral cavity	yes
tcga-cv-a6jo	69	negative	yes	11.757	no	6.47	1	large	positive	male	oral tongue
tcga-cv-a6jt	65	negative	no	11.9828	no	27.99	0	small	negative	male	oral tongue
tcga-cv-a6ju	61	negative	yes	8.09241	no	3.61	0	large	negative	female	oral tongue	yes
tcga-cv-a6jy	69	negative	yes	9.56671	no	21.22	0	large	negative	male	oral cavity
tcga-cv-a6jz	68	negative	yes	10.9821	yes	23.46	0	large	negative	male	oral cavity	yes
tcga-cv-a6k0	58	negative	no	9.93609	no	19.91	0	small	negative	male	oral tongue	no
tcga-cv-a6k1	65	negative	yes	8.35285	no	22.5	0	large	negative	male	larynx and hypopharynx	yes
tcga-cv-a6k2	79	negative	yes	10.9705	no	10.41	1	small	negative	male	oral cavity	no
tcga-cx-7082	82	negative	yes	8.93211	no	0.36	1	small	negative	male	oral cavity	no
tcga-cx-7085	77	negative	no	9.66878	no	10.55	0	large	negative	female	oral tongue	no	AA
tcga-cx-7086	53	negative	yes	8.88212	no	18.82	0	large	positive	male	oral cavity	yes	AG
tcga-cx-7219	47	negative	yes	11.2899	no	34.33	0	large	positive	male	oral cavity	yes
tcga-cx-a4aq	56	negative	yes	8.18949	no	36	0	small	positive	male	oral cavity	yes
tcga-d6-6515	82	negative	no	9.19945	no	13.24	1	small	negative	female	oral tongue		AA
tcga-d6-6516	69	negative	yes	9.76716	no	25.39	0	small	positive	male	oral cavity
tcga-d6-6517	59	negative	yes	10.939	no	9.59	0	large	negative	male	larynx and hypopharynx	no	AA
tcga-d6-6823	50	negative	yes	9.75272	no	23.03	0	large	positive	male	oral tongue	no	GG
tcga-d6-6824	61	negative	yes	9.29319	no	2.53	0	large	positive	male	larynx and hypopharynx	yes
tcga-d6-6825	73	negative	yes	11.8302	no	16.13	0	large	negative	male	oral tongue	no	AA
tcga-d6-6826	64	negative	no	8.9903	no	11.43	1	large	positive	female	larynx and hypopharynx		GG
tcga-d6-6827	55	negative	yes	7.17861	no	18.66	0	small	positive	female	oral cavity		AA
tcga-d6-8568	62	negative	yes	10.8487	no	24.93	0	small	negative	male	larynx and hypopharynx	no
tcga-d6-8569	52	negative	yes	10.6586	no	25.3	0	small	negative	male	oral tongue
tcga-d6-a4z9	59	negative	yes	11.0279	no	17.71	0	small	positive	male	oral tongue
tcga-d6-a4zb	61	negative	yes	9.78538	no	12.35	0	large	negative	male	oral tongue
tcga-d6-a6ek	67	negative	yes	9.41378	no	28.75	0	large	positive	male	larynx and hypopharynx
tcga-d6-a6em	65	negative	no	9.01046	no	7.62	0	small	positive	female	oral tongue
tcga-d6-a6en	71	negative	yes	9.40984	no	22.57	0	large	negative	male	oral cavity
tcga-d6-a6eo	44	negative	yes	7.94178	no	24.93	0	large	negative	male	oral cavity
tcga-d6-a6ep	62	negative	yes	7.50297	no	13.93	0	large	negative	male	larynx and hypopharynx
tcga-d6-a6eq	57	negative	no	11.5902	no	12.09	0	large	positive	male	larynx and hypopharynx
tcga-d6-a6es	50	negative		8.49091	no	12.78	0	large	positive	male	larynx and hypopharynx
tcga-d6-a74q	67	negative	yes	8.35237	yes	23.32	0	large	negative	male	larynx and hypopharynx
tcga-dq-5624	43	negative	no	10.8933	no	36	0	large	positive	female	oral tongue		AG
tcga-dq-5625	52	negative	yes	9.97091	no	36	0	small	negative	female	oral tongue	yes	AG
tcga-dq-5629	64	negative	yes	8.86004	no	30.91	1	large	positive	male	larynx and hypopharynx	no	AA
tcga-dq-5630	73	negative	no	10.9594	no	33.84	0	large	positive	male	oral tongue	no	GG
tcga-dq-5631	52	negative	yes	9.00732	no	18	1	large	positive	male	oral tongue	no	AG
tcga-dq-7588	66	negative	yes	9.14122	no	14.03	1	small	positive	male	oral cavity	no
tcga-dq-7589	70	negative	yes	8.92701	no	36	0	small	positive	male	larynx and hypopharynx	no
tcga-dq-7590	51	positive	no	8.66781	no	36	0	small	positive	male	oropharynx	no
tcga-dq-7591	62	positive	yes	7.75979	no	20.43	0	large	positive	male	oropharynx	no	AG
tcga-dq-7592	57	negative	yes	9.77228	no	36	0	large	positive	male	oral tongue	no
tcga-dq-7593	58	positive	yes	8.10094	no	36	0	large	positive	male	oropharynx	no
tcga-dq-7594	47	positive	no	8.2536	no	36	0	large	positive	male	oropharynx	no
tcga-dq-7595	53	negative	yes	8.35782	no	36	0	small	negative	male	larynx and hypopharynx	no
tcga-dq-7596	48	positive	no	8.20413	no	36	0	small	positive	male	oropharynx	no
tcga-f7-7848	47	negative	yes	8.88613	no	36	0	large	positive	male	larynx and hypopharynx	no
tcga-f7-8298	58	negative	yes	10.6698	no	32.69	0	small	negative	male	larynx and hypopharynx	no
tcga-f7-8489	48	negative	yes	11.3565	no	21.62	0	small	negative	male	oral cavity
tcga-f7-a50g	66	negative	yes	10.418	no	20.24	0			male	oral tongue
tcga-f7-a50i	72	negative	yes	10.3205	no	3.02	0			male	larynx and hypopharynx	no
tcga-f7-a50j	67	negative	yes	10.6857	no	31.11	0			female	oral tongue	no
tcga-f7-a61s	62	negative	yes	11.5717	no	18.92	0			male	oral tongue	no
tcga-f7-a61v	54	negative	yes	9.11442	no	24.93	0			male	oropharynx
tcga-f7-a61w	51	negative	yes	9.78731	no	0.46	0			male	oral tongue	yes
tcga-f7-a620	47	negative	yes	10.435	no	17.84	0			male	oropharynx
tcga-f7-a622	75	negative	no	9.71935	no	11.79	1			male	larynx and hypopharynx	no
tcga-f7-a623	70	negative	yes	9.64181	no	20.24	0			male	larynx and hypopharynx	no
tcga-f7-a624	73	negative	no	8.47829	no	12.42	0			male	oral cavity	no
tcga-h7-7774	75	negative	yes	7.97296	no	13.37	0	large	negative	female	oral cavity	no	AG
tcga-h7-8501	54	negative	yes	11.1786	no	15.14	0	large	positive	male	oral cavity	no
tcga-h7-8502	50	negative	yes	10.649	no	15.05	0	large	positive	male	oral cavity	yes
tcga-h7-a6c4	35	negative	yes	10.6974	no	0	0	large	positive	female	oral tongue	no
tcga-h7-a6c5	65	negative	yes		no	21.09	0	large	positive	male	larynx and hypopharynx
tcga-h7-a76a	57	positive	yes	8.59562	no	20.93	0	small	positive	male	oropharynx	no
tcga-hd-7229	60	negative	yes	11.0183	no	33.74	0	large		male	larynx and hypopharynx
tcga-hd-7753	62	negative	yes	9.61443	no	28.45	0	small	negative	male	oropharynx	yes	AG
tcga-hd-7754	69	positive	yes	9.0693	no	25.72	0	small	positive	male	oropharynx	yes	AA
tcga-hd-7831	74	negative	no	11.1517	no	21.91	0	large	negative	male	oral tongue	no
tcga-hd-7832	52	positive	yes	10.7474	no	27.46	0	large	positive	male	oral cavity	yes
tcga-hd-7917	62	negative	yes	9.60412	no	27.46	1	small	negative	male	oral cavity	no
tcga-hd-8224	63	negative	no	8.94432	no	14.65	1	large	negative	male	oropharynx	yes
tcga-hd-8314	58	positive	no	8.12775	no	22.01	0	small	positive	male	oropharynx
tcga-hd-8634	51	negative	yes	10.4499	no	12.65	1	small		female	oral tongue	yes
tcga-hd-8635	61	negative	yes	10.3225	no	22.83	0	small	positive	female	oral tongue	no
tcga-hd-a4c1	41	negative	no	10.7637	no	0.36	0	large	positive	female	oral cavity
tcga-hd-a633	74	negative	no	10.0719	no	13.83	0	large	negative	male	oral cavity
tcga-hd-a634	56	positive	yes	8.75591	no	4.27	1	large	positive	male	oropharynx
tcga-hd-a6hz	79	negative	no	9.17333	no	3.65	0	small	negative	female	oral tongue
tcga-hd-a6i0	56	negative	yes	9.62695	no	6.9	0	large		male	oral cavity	yes
tcga-hl-7533	65	positive	yes	10.5937	no	34.72	0	small	positive	male	oral cavity	no
tcga-iq-7630	49	negative	no	10.5951	no	15.93	0	large	negative	male	oropharynx
tcga-iq-7631	60	negative	yes	8.91324	no	36	0	small	negative	female	oral cavity
tcga-iq-7632	68	negative	yes	9.66464	no	14.49	0	large	negative	female	oral cavity		AG
tcga-iq-a61e	55	negative	yes	10.2028	no	36	0	large	negative	female	oral tongue	yes
tcga-iq-a61g	57	negative	yes	9.67132	no	11.83	0	large	positive	male	oral cavity
tcga-iq-a61h	76	negative	yes	9.59697	no	36	0	small	negative	male	oral tongue
tcga-iq-a61i	63	negative	no	7.74271	no	0.07	1	small	positive	male	oropharynx
tcga-iq-a61j	54	negative	no	10.8721	no	33.54	0	small	positive	male	oral tongue
tcga-iq-a61k	70	negative	yes		no	5.29	1	large	positive	female	oral tongue
tcga-iq-a61l	72	positive	no		no	13.67	0	small	negative	female	oral tongue
tcga-iq-a61o	43	negative	no	10.6948	no	13.83	1	small	positive	male	oropharynx
tcga-iq-a6sg	61	negative	no	8.6883	no	19.02	0	large	negative	female	oral tongue
tcga-iq-a6sh	55	negative	yes	10.3464	no	15.47	0	small	positive	male	oral tongue
tcga-ku-a66s	69	negative	yes	9.01896	no	13.34	1	small	positive	female	larynx and hypopharynx
tcga-ku-a66t	53	negative	no	10.472	no	18.13	0	large	negative	female	oral cavity
tcga-ku-a6h7	55	positive	yes	9.05487	no	19.25	0	small	positive	female	oropharynx	no
tcga-ku-a6h8	41	negative	yes	8.9514	no	10.74	1	small	negative	male	oral tongue	no
tcga-mt-a51w	52	negative	yes	10.4789	no	14.36	0	small		female	oropharynx	no
tcga-mt-a51x	30	negative	yes	10.0907	no	7.95	0	small	positive	male	oral tongue
tcga-mt-a67a	85	negative	no	9.89569	no	30.03	0	small	negative	female	oral tongue	no
tcga-mt-a67d	55	negative	yes	9.85074	no	1.84	0	small	negative	male	oral cavity	no
tcga-mt-a67f	60	negative	no	10.1141	no	12.61	0	large	negative	female	oral cavity	no
tcga-mt-a67g	53	negative	no		no	6.24	0	small	positive	female	oropharynx	yes
tcga-mt-a7bn	74	negative	no	7.89347	no	15.41	0	small	positive	male	oral cavity	no
tcga-mz-a5bi	53	positive		8.03602	no	7.13	1	small	positive	male	oropharynx	no
tcga-mz-a6i9	68	positive	yes	7.7047	no	16.06	1	large	positive	male	oropharynx	yes
tcga-mz-a7d7	51	negative	yes	11.4998	no	17.97	0	large	positive	male	oropharynx	yes
tcga-p3-a5q5	54	positive	yes	7.82435	no	29.89	0		positive	male	oropharynx
tcga-p3-a5q6	49	negative	yes	10.8202	no	15.77	1	large	negative	male	oropharynx
tcga-p3-a5qa	41	negative	no	12.4433	no	36	0	small	negative	male	oral tongue
tcga-p3-a5qe	49	positive	no	8.25471	no	36	0	small	positive	male	oropharynx
tcga-p3-a5qf	49	positive	no	7.73507	no	10.84	1	large	positive	male	oral cavity
tcga-p3-a6sw	50	positive	yes	7.34077	no	36	0	large	positive	male	oropharynx	no
tcga-p3-a6sx	67	negative	yes	10.3477	no	36	0	large	negative	male	oropharynx
tcga-p3-a6t0	47	negative	yes	10.4282	no	18.99	0	large	positive	female	oral cavity
tcga-p3-a6t2	45	negative	no	10.3897	no	36	0	small	negative	male	oral cavity	no
tcga-p3-a6t3	49	negative	no	10.3847	no	18.96	1	large	positive	male	oral cavity
tcga-p3-a6t4	54	negative	yes	9.56008	no	2.04	1	large	positive	male	oral cavity	yes
tcga-p3-a6t5	79	negative	yes	8.99541	no	28.98	1	large	negative	female	oral cavity
tcga-p3-a6t6	53	positive	no	7.24212	no	12.98	1	large	negative	male	oral cavity	yes
tcga-p3-a6t7	55	negative	yes	10.8488	no	16	1	large	positive	male	oral cavity	yes
tcga-p3-a6t8	54	negative	yes	11.5489	no	13.14	0	large	negative	male	oral cavity	yes
tcga-qk-a64z	79	negative	no	12.2927	no	21.06	1	small	negative	female	oral cavity	no
tcga-qk-a652	60	negative	no	10.2216	no	21.19	0	small	negative	male	oral tongue	no
tcga-qk-a6if	61	positive	no	8.63798	no	23.13	0	small	positive	male	oropharynx	no
tcga-qk-a6ig	69	negative	yes	10.3261	no	7.29	1	small	negative	male	oral cavity
tcga-qk-a6ih	65	negative	no	10.2891	no	21.45	0	large	positive	female	oral cavity
tcga-qk-a6ii	52	negative	yes	9.41963	no	9.33	1	large	negative	male	oral cavity	yes
tcga-qk-a6ij	71	negative	yes	9.2527	no	12.71	0	small	negative	male	oral cavity
tcga-qk-a6v9	56	positive	no	8.49509	no	27.37	0	small	negative	male	oropharynx
tcga-qk-a6vb	66	negative	yes	8.84409	no	21.06	0	large	negative	male	oral cavity
tcga-qk-a6vc	62	negative	yes	9.21354	no	19.71	0	large	positive	female	larynx and hypopharynx
tcga-qk-a8z7	59	negative	yes	7.01174	no	12.88	0	large	positive	male	oral cavity	no
tcga-qk-a8z8	60	negative	yes	8.13924	no	5.62	1	large	positive	female	larynx and hypopharynx	yes
tcga-qk-a8z9	56	negative	yes	10.8738	no	14.75	1	large	positive	male	oral cavity
tcga-qk-a8za	60	negative	yes	8.31384	no	12.19	1	small	positive	male	oropharynx	yes
tcga-qk-a8zb	68	negative	yes	10.1538	no	17.81	0	large	negative	male	larynx and hypopharynx	no
tcga-qk-aa3j	69	negative	yes	8.26962	no	15.31	0	small	negative	male	larynx and hypopharynx
tcga-qk-aa3k	60	negative	yes	10.4048	no	8.31	0	large	positive	male	oral tongue
tcga-rs-a6to	82	negative	no	11.6859	no	12.71	1	large	positive	female	oral cavity
tcga-rs-a6tp	58	positive	yes	8.21514	no	16.95	0	small	negative	male	oropharynx	no
tcga-t2-a6wx	73	negative	no	11.0143	no	6.87	1	large	negative	female	oral tongue	no
tcga-t2-a6wz	53	negative	yes	8.43005	no	15.9	1	large	positive	male	oral tongue	yes
tcga-t2-a6x0	49	positive	yes	8.89849	no	7.1	0	small	positive	male	oropharynx	no
tcga-t2-a6x2	82	negative	yes	9.91143	no	32.42	0	large	negative	male	oral cavity	no
tcga-t3-a92m	52	negative	yes	11.27	no	13.7	0	large	positive	male	larynx and hypopharynx
tcga-t3-a92n	79	negative	yes	10.6712	no	3.12	1	small	positive	male	oral cavity
tcga-tn-a7hi	56	positive	yes	7.93987	no	13.53	0	small	negative	male	oropharynx
tcga-tn-a7hj	51	negative	no	8.96399	no	13.24	0	large		male	larynx and hypopharynx
tcga-tn-a7hl	59	positive	yes	8.63592	no	20.34	0	large		male	larynx and hypopharynx	no
tcga-uf-a718	62	negative	yes	10.5748	no	36	0	large	negative	male	larynx and hypopharynx
tcga-uf-a719	54	negative	yes	9.28351	no	36	0	large	negative	male	oral cavity
tcga-uf-a71a	67	negative	yes	9.59711	no	2.83	1	large	positive	male	oral cavity
tcga-uf-a71b	50	negative	yes	10.6511	no	36	0	large	positive	male	oral cavity
tcga-uf-a71d	54	negative	yes	8.96148	no	36	0	large	positive	female	larynx and hypopharynx
tcga-uf-a71e	63	negative	no	9.19306	no	36	0	large	negative	male	oral cavity
tcga-uf-a7j9	75	negative	yes	9.19163	no	36	0	large	negative	male	larynx and hypopharynx	yes
tcga-uf-a7ja	66	negative	yes	9.57238	no	36	0	large	positive	female	oral cavity
tcga-uf-a7jc	42	negative	yes	10.0813	no	17.94	1	large	positive	male	oral cavity
tcga-uf-a7jd	71	negative	yes	10.7002	no	24.28	1	large	negative	male	oral cavity
tcga-uf-a7jf	80	negative	yes	8.1492	no	36	0	large	positive	male	larynx and hypopharynx
tcga-uf-a7jh	59	negative	yes	8.87419	no	29.43	0	large	negative	male	larynx and hypopharynx
tcga-uf-a7jj	68	negative	yes	9.8603	no	18.04	0	large	negative	male	larynx and hypopharynx
tcga-uf-a7jk	59	negative	yes	10.9104	no	13.93	1	large	negative	male	larynx and hypopharynx
tcga-uf-a7jo	79	negative	no	9.85343	no	20.73	1	large	negative	female	oral cavity
tcga-uf-a7js	59	negative	yes	9.04345	no	22.34	1	large	positive	male	oral tongue
tcga-uf-a7jt	72	negative	no	11.0403	no	32.62	1	large	negative	female	oral cavity
tcga-uf-a7jv	62	negative	no	11.6845	no	2.96	1	large	positive	female	larynx and hypopharynx
tcga-up-a6ww	58	positive	no	7.69134	no	17.02	0	small	positive	male	oral tongue	yes
tcga-wa-a7gz	58	negative	yes	10.3282	no	20.53	1	small	negative	male	oral cavity
tcga-wa-a7h4	69	negative	yes	10.3324	no	14.55	0	small	negative	male	oral tongue
