# Supplementary material for: Single Nucleotide Polymorphism rs6942067 Is a Risk Factor in Young and in Non-Smoking Patients with HPV Negative Head and Neck Squamous Cell Carcinoma
Source: Cancers (Basel). 2019 Dec 24;12(1):55. doi: 10.3390/cancers12010055 (PMC7017251; doi:10.3390/cancers12010055)
Supplement: Supplementary file 1 [file cancers-12-00055-s001.zip › Table S2.xlsx]

## Sheet: Feuil1
Supplementary Table 2. Raw data from the gnomAD cohort.
rs6942067	All participants	European participants
AA	6031	4037
AG	7282	4290
GG	2341	1104
